# Supplementary material for: Physiological and Metabolic Responses of Leymus chinensis Seedlings to Alkali Stress
Source: MDPI journal article supplement (doi:10.3390/plants11111494), 2022-06-02
Supplement: s1 [file s1]

**Table S1.** The contribution of metabolites in seedling leaves to the first principal component (PC1) and the second principal component (PC2).

| Metabolite Name           | PC1   | PC2   |
|---------------------------|-------|-------|
| thymidine                 | -0.12 | 0.28  |
| deoxyguanosine            | -0.09 | 0.23  |
| deoxycytidine             | -0.17 | 0.21  |
| CMP                       | -0.09 | 0.16  |
| cytosine                  | -0.12 | 0.15  |
| 5-methylcytosine          | -0.13 | 0.13  |
| tartaric acid             | -0.09 | 0.12  |
| deoxyadenosine            | -0.12 | 0.09  |
| betaine aldehyde          | -0.09 | 0.08  |
| glucose-6p                | 0.09  | 0.07  |
| arginine                  | -0.06 | 0.07  |
| fucose                    | 0.09  | 0.06  |
| xylose                    | 0.10  | 0.04  |
| stearic acid              | 0.10  | 0.04  |
| oleic acid                | 0.06  | 0.04  |
| guanosine                 | -0.05 | 0.04  |
| glutamate                 | 0.10  | 0.03  |
| glyceric acid             | 0.09  | 0.03  |
| serine                    | 0.10  | 0.02  |
| GlcNAc-1p                 | 0.10  | 0.02  |
| phosphatidylcholine       | 0.10  | 0.02  |
| sucrose                   | 0.08  | 0.02  |
| dCDP                      | 0.07  | 0.02  |
| homoserine                | 0.07  | 0.02  |
| malic acid                | 0.07  | 0.02  |
| phosphorylcholine         | 0.07  | 0.02  |
| phosphatidylcholine       | 0.07  | 0.02  |
| ascorbic acid             | -0.11 | 0.02  |
| glutamine                 | 0.11  | 0.01  |
| threonine                 | 0.06  | 0.01  |
| cytidine                  | -0.12 | 0.01  |
| N-acetyl-l-aspartic acid  | 0.18  | 0.00  |
| choline                   | 0.06  | 0.00  |
| dTMP                      | -0.09 | 0.00  |
| galactarate               | -0.1  | 0.00  |
| dCMP                      | 0.14  | -0.01 |
| phenylalanine             | 0.08  | -0.01 |
| kaempferol 3-o-rutinoside | -0.07 | -0.01 |
| succinate                 | 0.10  | -0.02 |
| tyrosine                  | 0.06  | -0.02 |
| apigenin                  | -0.05 | -0.02 |
| glucosamine               | 0.08  | -0.03 |
| 3'-AMP                    | -0.06 | -0.03 |
| arabinose                 | -0.07 | -0.03 |
| dAMP                      | -0.09 | -0.03 |
| alpha-ketoglutaric acid   | 0.10  | -0.04 |

|                   |       |       |
|-------------------|-------|-------|
| o-Acetyl-l-serine | -0.07 | -0.04 |
| ACC               | -0.12 | -0.04 |
| glucarate         | -0.05 | -0.06 |
| vitexin           | 0.11  | -0.08 |
| GlcNAc            | 0.09  | -0.09 |
| AMP               | 0.11  | -0.11 |
| GABA              | -0.04 | -0.11 |
| allantoin         | -0.07 | -0.12 |
| cystine           | -0.12 | -0.15 |
| tryptophan        | -0.09 | -0.18 |
| asparagine        | -0.09 | -0.21 |

CMP, cytidine 5'-monophosphate; dTMP, deoxythymidine 5'-phosphate; dAMP, 2'-deoxyadenosine 5'-monophosphate; 3'-AMP, adenosine 3'-monophosphate; dCDP, 2'-deoxycytidine diphosphate; dCMP, 2'-deoxycytidine 5'-monophosphate; AMP, adenosine monophosphate; ACC, 1-aminocyclopropane-1-carboxylic acid; GABA, 4-acetamidobutyric acid; GlcNAc, N-acetyl-D-glucosamine; GlcNAc-1p, N-acetyl-glucosamine-1-phosphate.

**Table S2.** Relative contents and fold changes of metabolites in seeding leaves under alkali treatment.

| Compound Name    | Platform | Relative Concentration |       | Fold Change                         | P Value |
|------------------|----------|------------------------|-------|-------------------------------------|---------|
|                  |          | CK                     | AS    | Log <sub>2</sub> <sup>(AS/CK)</sup> |         |
| Nucleotide       |          |                        |       |                                     |         |
| deoxycytidine    | pos      | 0.12                   | 1.94  | 3.97                                | <0.01   |
| 5-methylcytosine | pos      | 0.2                    | 1.06  | 2.43                                | <0.01   |
| cytidine         | pos      | 0.14                   | 0.7   | 2.38                                | <0.05   |
| cytosine         | pos      | 0.24                   | 1.16  | 2.30                                | <0.01   |
| thymidine        | neg      | 0.46                   | 2.14  | 2.23                                | <0.05   |
| dTMP             | neg      | 0.04                   | 0.1   | 1.55                                | <0.05   |
| CMP              | pos      | 0.19                   | 0.55  | 1.49                                | <0.01   |
| deoxyadenosine   | pos      | 2.14                   | 10.87 | 2.34                                | <0.05   |
| dAMP             | neg      | 0.01                   | 0.03  | 1.52                                | <0.05   |
| deoxyguanosine   | neg      | 0.41                   | 1.13  | 1.45                                | <0.01   |
| allantoin        | neg      | 1.22                   | 2.59  | 1.08                                | <0.05   |
| 3'-AMP           | neg      | 0.04                   | 0.06  | 0.84                                | <0.05   |
| guanosine        | pos      | 0.03                   | 0.05  | 0.73                                | <0.05   |
| dCDP             | neg      | 0.03                   | 0.02  | -0.45                               | <0.05   |
| dCMP             | pos      | 0.21                   | 0.05  | -2.05                               | <0.01   |
| AMP              | neg      | 0.19                   | 0.07  | -1.37                               | <0.05   |
| Flavonoid        |          |                        |       |                                     |         |
| kaempferol       | pos      | 0.13                   | 0.27  | 1.03                                | <0.01   |
| 3-o-rutinoside   |          |                        |       |                                     |         |
| apioside         | neg      | 0.18                   | 0.36  | 0.98                                | <0.01   |
| apigenin         | pos      | 0.49                   | 0.82  | 0.76                                | <0.05   |
| vitexin          | pos      | 0.15                   | 0.06  | -1.34                               | <0.05   |
| Others           |          |                        |       |                                     |         |
| betaine aldehyde | pos      | 0.28                   | 0.80  | 1.51                                | <0.05   |
| Amino acid       |          |                        |       |                                     |         |
| ACC              | pos      | 0.02                   | 0.11  | 2.60                                | <0.05   |
| cystine          | pos      | 0.01                   | 0.06  | 2.26                                | <0.01   |

|                          |     |       |       |       |       |
|--------------------------|-----|-------|-------|-------|-------|
| asparagine               | pos | 0.20  | 0.60  | 1.62  | <0.01 |
| tryptophan               | pos | 0.02  | 0.05  | 1.37  | <0.01 |
| o-acetyl-l-serine        | neg | 0.02  | 0.05  | 1.03  | <0.01 |
| arginine                 | pos | 0.05  | 0.09  | 0.84  | <0.05 |
| GABA                     | pos | 2.42  | 3.83  | 0.66  | <0.01 |
| tyrosine                 | pos | 0.21  | 0.18  | -0.26 | <0.05 |
| threonine                | neg | 0.53  | 0.44  | -0.27 | <0.05 |
| homoserine               | pos | 3.00  | 2.28  | -0.39 | <0.01 |
| phenylalanine            | pos | 0.59  | 0.43  | -0.45 | <0.01 |
| serine                   | pos | 0.20  | 0.10  | -1.02 | <0.01 |
| glutamate                | neg | 0.28  | 0.13  | -1.16 | <0.05 |
| glutamine                | neg | 2.78  | 1.15  | -1.28 | <0.01 |
| N-acetyl-l-aspartic acid | neg | 0.27  | 0.02  | -3.69 | <0.01 |
| Carbohydrate             |     |       |       |       |       |
| arabinose                | pos | 0.24  | 0.49  | 1.00  | <0.05 |
| glucosamine              | neg | 0.25  | 0.16  | -0.67 | <0.05 |
| fucose                   | pos | 0.05  | 0.03  | -0.77 | <0.05 |
| GlcNAc                   | neg | 0.05  | 0.03  | -0.84 | <0.05 |
| glucose-6p               | neg | 0.08  | 0.04  | -0.93 | <0.05 |
| GlcNAc-1p                | neg | 0.06  | 0.03  | -1.01 | <0.01 |
| sucrose                  | neg | 7.00  | 3.19  | -1.14 | <0.01 |
| xylose                   | pos | 0.41  | 0.17  | -1.25 | <0.01 |
| Organic acid             |     |       |       |       |       |
| ascorbic acid            | neg | 0.10  | 0.36  | 1.90  | <0.01 |
| galactarate              | neg | 0.51  | 1.65  | 1.70  | <0.05 |
| tartaric acid            | neg | 0.07  | 0.19  | 1.35  | <0.01 |
| glucarate                | neg | 0.06  | 0.11  | 0.78  | <0.05 |
| malic acid               | neg | 7.22  | 5.64  | -0.36 | <0.01 |
| glyceric acid            | neg | 0.08  | 0.05  | -0.81 | <0.01 |
| succinate                | neg | 1.17  | 0.64  | -0.88 | <0.01 |
| alpha-ketoglutaric acid  | neg | 0.03  | 0.01  | -1.20 | <0.05 |
| Fatty acids              |     |       |       |       |       |
| oleic acid               | pos | 1.20  | 1.06  | -0.17 | <0.05 |
| stearic acid             | pos | 0.14  | 0.06  | -1.16 | <0.01 |
| Lipid                    |     |       |       |       |       |
| choline                  | pos | 19.96 | 16.20 | -0.30 | <0.05 |
| phosphorylcholine        | pos | 1.72  | 1.27  | -0.44 | <0.05 |
| phosphatidylcholine      | pos | 2.13  | 0.98  | -1.12 | <0.05 |

The relative concentration of each metabolite is the average of UHPLC-Triple-TOF-MS data from four biological replicates. The fold changes were calculated using the formula  $\log_2^{(AS/CK)}$ . CK: Control, AS: Alkali stress. Relative contents values were increased 10 times in each treatment. Significant differences between control and alkali stress were determined with the *T-test* and marked as  $P < 0.05$  and  $P < 0.01$ . dTMP, deoxythymidine 5'-phosphate; CMP, cytidine 5'-monophosphate; dAMP, 2'-deoxyadenosine 5'-monophosphate; 3'-AMP, adenosine 3'-monophosphate; dCDP, 2'-deoxycytidine diphosphate; dCMP, 2'-deoxycytidine 5'-monophosphate; AMP, adenosine monophosphate; ACC, 1-aminocyclopropane-1-carboxylic acid; GABA, 4-acetamidobutyric acid; GlcNAc, N-acetyl-D-glucosamine; GlcNAc-1p, N-acetyl- glucosamine-1-phosphate.
